# Supplementary material for: The gut microbiota is a transmissible determinant of skeletal maturation
Source: eLife. 2021 Jan 12;10:e64237. doi: 10.7554/eLife.64237 (PMC7803376; doi:10.7554/eLife.64237)
Supplement: Figure 1—source data 1. [file elife-64237-fig1-data1.xlsx]

## Sheet: Figure 1
				Figure 1
Panel	Group
		Anaeroplasma	Blautia	Clostridium_XlVa	Eisenbergiella	Lachnospiracea_incertae_sedis	Lactobacillus	Oscillibacter	Other	Parabacteroides	Turicibacter	Unclassified
B	BL6	8.8	0	7.05	6.96	5.29	10.69	3.02	33	15.22	0	12.69
	C3H	0	4.48	9.85	5.6	14.6	17.22	0	14.6	14.51	11.18	8.39
C	BL6 BL6	8259.32	8089.95	8267.81	9380.12	14552.4	2720.88	4211.73	3265.49	9507.28
	BL6 C3H	0*	0*	0*	0*	0*	0*	0*	0*
	C3H C3H	0*	0*	0*	0*	0*	0*	0*	0*
	C3H BL6	8134.89	14075.7	7108.31	4274.06	6798.35	5430.45	4764.78	5634.55	3099.49
D	BL6 BL6	5.81	4.53	4.82	5.63	6.18	4.23	4.81	4.16	4.46	5.09	4.59	3.75
	BL6 C3H	5.56	4.25	5.4	7.42	6.08	4.9	4.94	5.51	6.62	5.79
	C3H C3H	28.17	32.3	33.06	34.37	31.19	29.09	26.67	35.55	33.75	29.68
	C3H BL6	23.2	22.74	25.16	20.26	21.96	22.56	21.18	23.1	23.39	20.01	25.38
E	BL6 BL6	3.7093	3.4973	3.5826	3.6712	3.8395	3.8512	3.6058	3.6061	3.6991	3.6818
	BL6 C3H	3.5961	3.573	3.6531	3.988	3.9141	3.5908	3.4926	3.6233	3.5707	3.5841
	C3H C3H	5.4907	5.3472	5.0911	5.1042	5.4047	5.4668	5.0502	4.8015	5.6716	5.1424
	C3H BL6	4.6962	4.947	4.7464	4.4567	4.5262	4.6084	4.699	5.2404	4.8973	4.4388	4.5796
F	BL6 BL6	38.5	32.2	38.4	36.7	40.3	36.3	45.3	32	37.1	32.3
	BL6 C3H	38.1	33.2	39.3	36.3	38.7	38.3	36.1	35.8	38.2	35.7
	C3H C3H	70.4	67	69.4	69.1	71.6	71.4	67.9	72.3	65.7	68.7
	C3H BL6	61.5	57.1	63.3	58.6	59.4	61.5	61.8	57.5	62.5	58.3
G	BL6 BL6	270.3	288.7	279.5	275.6	260.5	259.9	280.9	272.9	275.2	274.7
	BL6 C3H	279.9	282.7	275.2	251.2	258	279.4	288	275.8	279.3	275.8
	C3H C3H	166.5	171.6	184.7	179.8	165.6	166.7	182.1	202.2	159.6	180.6
	C3H BL6	203.2	193	198.1	218	209.1	200.2	199.6	179.5	193.7	209.2	206.4
H	BL6 BL6	0.725313	0.728229	0.730833	0.718542	0.73375	0.687083	0.676875	0.704479	0.743021	0.696771
	BL6 C3H	0.776875	0.786574	0.729375	0.786667	0.782813	0.754896	0.794167	0.758958	0.793646	0.764479
	C3H C3H	1.0475	1.02646	1.05187	1.04823	1.14979	1.08031	1.22375	1.11906	1.11167
	C3H BL6	1.08396	0.965729	1.03656	1.03531	1.04	0.957812	1.07729	1.0274	1.03583
I	BL6 BL6	168	171	169	171	172	174	170	175	183	172
	BL6 C3H	187	180	187	188	187	185	183	182	185	181
	C3H C3H	354	356	354	366	372	371	385	366	368
	C3H BL6	356	350	338	347	345	349	384	339	331
J	BL6 BL6	54.021	50.037	40.101	30.459	51.603	45.459	32.54	34.302	63.663	62.628
	BL6 C3H	32.112	33.663	35.61	23.424	31.353	41.373	35.61	35.043	23.424	23.169
	C3H C3H	28.083	25.251	17.355	32.424	17.907	23.136	22.992	31.23	32.424	35.169
	C3H BL6	66.285	49.287	70.101	55.503	31.23	34.302	77.139	33.663	28.974	57.561
K	BL6 BL6	126.474	113.013	117.333	38.565	205.947	56.115	69.402	113.013	104.847	72.96
	BL6 C3H	86.919	72.96	53.376	74.808	104.847	42.621	73.878	88.011	31.971	52.713
	C3H C3H	48.903	90.24	61.245	86.919	47.697	80.637	53.376	90.24	44.25	33.609
	C3H BL6	145.119	71.16	44.25	83.718	51.411	83.718	98.493	107.502	85.839	28.566
