# Supplementary material for: The gut microbiota is a transmissible determinant of skeletal maturation
Source: eLife. 2021 Jan 12;10:e64237. doi: 10.7554/eLife.64237 (PMC7803376; doi:10.7554/eLife.64237)
Supplement: Figure 2—source data 1. [file elife-64237-fig2-data1.xlsx]

## Sheet: Figure 2
					Figure 2
Panel	Group
A	BL6 BL6	4.36	4.03	4.97	4.13	3.87	4.61	4.66	3.59	4.34	3.94
	BL6 C3H	0.8	2.42	2.53	0.72	1.08	2.3	1.5	1.45	0.78	1.54
	C3H C3H	1.88	1.51	1.9	1.24	2.01	1.19	1.29	2.54	1.92	1.2
	C3H BL6	3.15	3.56	4.19	5.21	3.23	5	4.72	3.56	4.44	4.11
B	BL6 BL6	1.55072	0.905351	1.16983	1.31796	0.635349	1.31207	0.508123	0.729309	0.937589	0.933691
	BL6 C3H	0.211466	0.536458	0.418819	0.401563	0.640381	0.599365	0.510024	0.450252	0.686786	0.562532
	C3H C3H	0.400947	0.408359	0.600646	0.406054	0.480507	0.65326	0.421597	0.860321	0.480477	0.428403
	C3H BL6	1.51576	0.88936	1.08536	1.37434	0.700864	0.319307	0.680186	0.92835	1.40537	1.06954
C	BL6 BL6	8.19	7.5	5.05	9.86	7.85	6.36	6.6	7.77	7.02	7.13
	BL6 C3H	4.48	4.2	5.02	4.39	3.43	3.45	3.28	1.09	1.32	0.56
	C3H C3H	4.69	5.61	1.61	4.72	4.65	6.94	5.37	2.8	3.77	2.7
	C3H BL6	6.75	8.47	4.78	3.21	4.42	7.42	8.25	9.26	8.4	7.92
D	BL6 BL6	0.89232	0.843824	1.11133	0.784891	0.676304	0.831464	0.822601	0.810072	0.846601	0.846421
	BL6 C3H	0.537672	0.644676	0.48112	0.418132	0.222016	0.251715	0.292658	0.620733	0.359886	0.425401
	C3H C3H	0.429353	0.345491	0.594386	0.415295	0.493805	0.440599	0.590995	0.684593	0.620029	0.512727
	C3H BL6	0.588746	0.69382	0.914231	0.645527	0.73889	0.924405	0.707044	0.732372	0.891317	0.759595
E	BL6 BL6	1.34578	0.867266	0.818457	0.937007	0.871811	1.18807	0.829734	0.800441	1.30836	1.03307
	BL6 C3H	0.563677	0.48439	0.740324	0.522258	0.672981	0.875754	0.439494	0.406326	0.619973	0.77996
	C3H C3H	1.258	0.114074	0.76718	0.867718	0.27004	0.905345	0.793165	0.496142	0.490031	0.129685
	C3H BL6	0.89201	0.814718	1.01942	0.991567	1.65807	0.69741	0.828619	1.88951	1.05209	0.778087
F	BL6 BL6	1.13825	1.73416	1.79581	0.841681	0.513435	0.713782	0.990594	0.680595	0.940388	0.651308
	BL6 C3H	0.550853	0.388437	0.771767	0.634741	0.27479	0.517571	0.391931	0.593381	0.776433	0.931157
	C3H C3H	0.99976	0.564289	0.703563	0.485411	0.683673	0.403081	0.538374	0.680589	0.233058	0.425682
	C3H BL6	1.01823	0.948696	1.11031	1.00623	1.19993	0.939615	1.22856	1.05404	1.3821	1.54026
G	BL6 BL6	1.12524	1.71434	1.88957	0.832062	0.507567	0.705625	0.979274	0.672818	0.929641	0.643865
	BL6 C3H	0.544558	0.405893	0.762948	0.627488	0.27165	0.511656	0.415549	0.5866	0.76756	0.460258
	C3H C3H	0.494168	0.55784	0.347761	0.479864	0.675861	0.424124	0.532222	0.672812	0.230395	0.841634
	C3H BL6	1.00659	0.937855	1.09763	0.994733	1.18622	0.928877	1.21452	1.04199	1.36631	1.52266
H	BL6 BL6	1.15398	0.281276	0.64282	0.959744	2.07224	1.2793	0.44143	0.760204	1.56349	0.845519
	BL6 C3H	1.40519	0.627443	1.02418	0.743969	1.09239	0.520699	1.22612	0.588623	1.14493	1.1623
	C3H C3H	0.986035	1.11318	0.914423	0.799505	1.10762	0.621769	0.788057	1.60354	0.434034	0.759
	C3H BL6	1.15588	1.10655	0.96407	1.05642	0.627265	1.23184	1.25374	0.634197	0.876416	0.722621
I	BL6 BL6	0.986748	0.291311	0.685344	0.835258	1.5801	2.89216	0.396635	0.710165	0.935896	0.686387
	BL6 C3H	0.415719	0.358634	0.395682	0.283259	0.225072	0.660217	0.59638	0.517411	0.364982	0.315725
	C3H C3H	0.299606	0.164634	0.345342	0.690428	0.447975	0.395576	0.287736	0.639272	0.230741	0.262141
	C3H BL6	1.29283	0.572531	1.14565	0.511271	0.434718	2.08676	1.43929	0.778842	1.02673	1.18915
