# Supplementary material for: The gut microbiota is a transmissible determinant of skeletal maturation
Source: eLife. 2021 Jan 12;10:e64237. doi: 10.7554/eLife.64237 (PMC7803376; doi:10.7554/eLife.64237)
Supplement: Figure 3—source data 1. [file elife-64237-fig3-data1.xlsx]

## Sheet: Figure 3
						Figure 3
Panel	Group	Akkermansia	Alkaliphilus	Anaeroplasma	Bacteroides	Barnesiella	Bifidobacterium	Clostridium_sensu_stricto	Clostridium_XlVa	Eisenbergiella	Lactobacillus	Other	Parabacteroides	Stomatobaculum	Turicibacter	Unclassified
B	JAX Mice	0	4.24	5.09	7.59	16.99	0	0	6.19	9.07	4.52	27.23	0	4.22	6.24	8.62
	TAC Mice	9.18	4.35	4.21	14.92	8.69			7.95	5.94		23.69	7.53		3.93	9.6
	Co-housed JAX Mice	5.85			13.67	27.73	3.69	9.55				29.75			5.5	4.27
	Co-housed TAC Mice	10.63	4.12		15.34	30.07	3.63					30.77				5.44
C	JAX Mice	0*	0*	0*	0*	0*	0*	0*	0*
	TAC Mice	72.9005	66.4498	112.466	91.2815	73.1752	251.467	97.987	115.269	72.9253
	Co-housed JAX Mice	55.2283	24.4862	159.092	232.287	110.023	138.531	47.6754	86.3629
	Co-housed TAC Mice	90.066	169.441	88.3656	15.2133	94.924	97.057	145.85	118.227
D	JAX Mice	9.64	6.51	6.89	7.54	6.14	7.54	5.99	8.4	6.14
	TAC Mice	6.29	6.14	5.65	6.79	5.72	5.8	6.05	5.41	6.19
	Co-housed JAX Mice	6.87	6.5	5.33	6.12	6.62	5.21	6.42	7	7.32
	Co-housed TAC Mice	6.77	5.9	5.74	6.41	6.22	6.96	5.16	4.63	6.79
E	JAX Mice	4.5123	3.692	3.9105	3.8393	3.7286	3.9117	3.7414	4.0852	3.6698
	TAC Mice	3.5693	3.3921	3.2547	3.8003	3.7136	3.6208	3.3125	3.6525	3.5849
	Co-housed JAX Mice	3.586	3.6635	3.4738	3.6614	3.7135	3.6662	3.5605	3.7772	3.625
	Co-housed TAC Mice	3.4419	3.3804	3.4954	3.6752	3.5362	3.7583	3.4053	3.3207	3.7799
F	JAX Mice	36.5	37.5	41	44.9	34.9	42.2	37.5	43.6	38.6
	TAC Mice	38.3	37.6	36.4	37.6	37.6	37.7	37.4	37.5	37
	Co-housed JAX Mice	40.8	42.8	37.9	41	39.4	36.5	40.1	42.8	41.4
	Co-housed TAC Mice	40.7	39	38.1	38.2	43.8	37.4	37.3	35.1	38.6
G	JAX Mice	222	271.5	257.1	258.7	269.8	256.1	269.5	244.1	273.1
	TAC Mice	281.7	297.5	310.2	262.7	270.8	277.8	305.6	274	281.1
	Co-housed JAX Mice	281.6	273.4	290.4	292.1	269.6	271	283.8	269.9	262.4
	Co-housed TAC Mice	291	296.4	291.2	270.1	284.3	267.2	295.2	303.6	266.5
H	JAX Mice	0.7691	0.77	0.75	0.8252	0.7109	0.7617	0.8096	0.8041	0.7593
	TAC Mice	0.761	0.7075	0.709	0.6886	0.781	0.759	0.7219	0.7057	0.7534
	Co-housed JAX Mice	0.7261	0.8057	0.7373	0.7582	0.624	0.7327	0.7959	0.73	0.8243
	Co-housed TAC Mice	0.7712	0.7278	0.7608	0.7777	0.763	0.7284	0.8516	0.7598	0.7101
I	JAX Mice	184	188	177	192	175	182	185	191	174
	TAC Mice	174	181	176	167	184	178	172	172	178
	Co-housed JAX Mice	175	184	182	179	196	180	191	176	191
	Co-housed TAC Mice	183	171	184	186	182	178	200	177	172
J	JAX Mice	19.897	18.051	18.609	12.378	20.89	18.837	18.161	16.08	20.89
	TAC Mice	28.319	27.638	24.322	25.692	29.372	19.067	30.65	30.65	29.732
	Co-housed JAX Mice	24.028	22.886	31.215	23.737	21.799	27.47	20.264	21.535	23.882
	Co-housed TAC Mice	20.763	28.319	21.667	22.886	23.167	23.167	16.08	23.167	24.322
K	JAX Mice	71.509	91.689	71.509	76.094	79.163	75.665	93.785	57.368	93.256
	TAC Mice	83.293	90.148	67.2	41.573	38.223	61.392	35.546	52.706	95.928
	Co-housed JAX Mice	47.897	136.939	31.878	66.445	73.143	9.043	69.517	61.046	39.289
	Co-housed TAC Mice	39.512	67.2	69.911	173.612	69.125	22.331	61.392	54.216	64.96
