# Supplementary material for: The gut microbiota is a transmissible determinant of skeletal maturation
Source: eLife. 2021 Jan 12;10:e64237. doi: 10.7554/eLife.64237 (PMC7803376; doi:10.7554/eLife.64237)
Supplement: Figure 4—source data 1. [file elife-64237-fig4-data1.xlsx]

## Sheet: Figure 4
					Figure 4
Panel	Group
A	JAX Mice	1.26	2.43	1.64	2.64	3.05	0.86	2.31	1.13	1.86
	TAC Mice	6.49	7.02	8.55	8.05	10.5	10.3	6.23	7.18	7.97
	Co-housed JAX Mice	5.14	7.18	5.47	6.63	8.16	7.54	6.58	7.52
	Co-housed TAC Mice	5.99	5.37	6.09	4.71	6.74	7.68	8.12	7.86
B	JAX Mice	0.780017	0.322328	0.518869	1.7219	1.67657	0.150925	2.42685	0.402543
	TAC Mice	1.90102	2.69477	2.12536	1.64851	3.09619	2.14002	2.29506	3.3201	2.28714
	Co-housed JAX Mice	1.76712	1.49887	2.1996	1.68685	2.30865	2.51032	1.59823	1.89169
	Co-housed TAC Mice	1.70449	1.38505	1.79544	2.68898	2.1925	2.40659	2.02537	2.19622	2.89706
C	JAX Mice	5.04	3.69	3.03	1.47	4.93	3.65	5	3.3	4.07
	TAC Mice	9.3	8.13	8.61	10.8	10.7	11.8	9.44	10.4	8.23
	Co-housed JAX Mice	6.45	7.85	8.95	10.6	9.44	7.46	6.85	7.25
	Co-housed TAC Mice	8.36	7.17	9.47	10.9	8.52	7.68	6.98	7.86
D	JAX Mice	0.269353	0.175491	0.524386	0.475295	0.353805	0.250599	0.360995	0.474593	0.360029
	TAC Mice	0.842303	0.633824	1.1153	0.795891	0.687304	0.412464	0.762601	0.710072	0.59206
	Co-housed JAX Mice	0.687672	0.534676	0.60112	1.11813	1.02202	1.15172	1.13266	0.750733
	Co-housed TAC Mice	0.738746	0.59382	1.04	0.755527	0.78889	0.564405	0.597044	0.702372
E	JAX Mice	0.554863	0.857373	1.16361	1.11201	1.7294	0.836844	0.499728	0.802635	1.44354
	TAC Mice	2.31973	1.37684	2.76737	2.137	3.40387	2.96183	2.14263	1.8879	2.02972
	Co-housed JAX Mice	2.77328	2.65589	2.05307	2.07861	2.5687	2.46185	2.58203	2.13394	2.3601
	Co-housed TAC Mice	1.79621	2.87556	1.49487	2.76967	1.45401	2.87943	1.65454	1.56676	2.67231
F	JAX Mice	0.949352	0.556795	1.46898	1.08776	1.17584	1.14972	0.830467	0.781096
	TAC Mice	1.81668	2.20425	1.96366	2.71433	1.2077	1.81991	2.78165	2.12394	2.77339
	Co-housed JAX Mice	1.74394	1.42663	2.03276	1.93643	2.60025	1.9986	1.8305	1.8254
	Co-housed TAC Mice	2.30406	1.39114	2.22986	2.36542	1.39128	1.37367	2.31775	1.74621	1.71852
G	JAX Mice	1.19898	0.723271	0.604634	0.988242	1.12665	1.18165	1.09051	0.873554	1.2125
	TAC Mice	2.48031	1.69008	2.99954	3.37411	2.23912	2.85366	2.20975	2.01695	3.02355
	Co-housed JAX Mice	2.35309	3.65759	3.20257	3.24337	1.86469	2.29149	2.93691	3.4569	1.03437
	Co-housed TAC Mice	2.623	2.36077	2.41545	3.54287	2.12739	1.99965	1.80407	2.21066	3.0277
H	JAX Mice	0.33513	1.05556	3.69286	1.57291	0.887736	0.135812	0.637263	0.656435
	TAC Mice	0.133432	5.56813	0.684098	0.731495	0.670923	1.94801	2.88452	0.83327	0.673547
	Co-housed JAX Mice	0.662593	0.950828	0.576088	1.38011	5.94467	1.2632	0.349681	2.05159
	Co-housed TAC Mice	0.424126	0.398549	0.566136	0.324098	0.572004	2.46863	3.23395	1.67892	0.924173
I	JAX Mice	0.375842	0.51011	1.12885	1.27802	1.98877	0.724214	0.427274	0.911744	1.65518
	TAC Mice	1.58231	2.3672	2.4091	2.40739	2.89699	1.81464	1.40211	2.39993	1.75563
	Co-housed JAX Mice	2.56926	2.68584	3.05343	2.93673	2.82807	3.5202	2.16948	4.06385	2.68557
	Co-housed TAC Mice	1.45701	1.16588	1.20192	2.95568	2.24481	1.83494	2.70723	2.33112	4.01554
