# Supplementary material for: The gut microbiota is a transmissible determinant of skeletal maturation
Source: eLife. 2021 Jan 12;10:e64237. doi: 10.7554/eLife.64237 (PMC7803376; doi:10.7554/eLife.64237)
Supplement: Figure 5—source data 1. [file elife-64237-fig5-data1.xlsx]

## Sheet: Figure 5
					Figure 5
Panel	Group	Blautia	Clostridium_XlVa	Klebsiella	Eisenbergiella	Lachnospiracea_incertae_sedis	Lactobacillus	Other	Parabacteroides	Turicibacter	Unclassified
B	C3H - C3H	0	7.05	0	6.96	5.29	10.69	33	15.22	0	12.69
	C3H + C3H	0	7.02	0	0	6.14	12.02	20.44	24.06	6.07	11.29
	C3H + BL6	4.49	8.63	4.2	0	0	8.44	15.44	26.87	3.98	3.68
	BL6 - BL6	4.48	9.85	0	5.6	14.6	17.22	14.16	14.51	11.18	8.39
	BL6 + BL6	5.9	10.99	0	7.91	16.92	24.15	17.29	7.49	0	9.36
	BL6 + C3H	0	6.54	0	11.62	5.2	26.5	18.4	12.88	4.62	10.45
Panel	Group
C	C3H - C3H	0*	0*	0*	0*	0*	0*	0*	0*	0*
	C3H + C3H	0*	0*	0*	0*	0*	0*	0*	0*	0*
	C3H + BL6	85.9005	86.4498	116.466	98.2815	106.175	165.467	98.987	126.269	110.499
	BL6 - BL6	78.2283	54.4862	139.092	132.287	110.023	138.531	47.6754	86.3629	98.3358
	BL6 + BL6	90.066	119.441	76.3656	63.2133	85.9241	69.057	65.8504	78.2268	81.018
	BL6 + C3H	0*	0*	0*	0*	0*	0*	0*	0*
Panel	Group
D	C3H - C3H	28.17	32.3	33.06	34.37	31.19	29.09	26.67	35.55	33.75	29.68
	C3H + C3H	28.83	30.51	26.27	27.49	29.98	28.23	30.16	26.26	30.01
	C3H + BL6	25.9	28.12	21.66	29.39	21.6	24.9	25.19	29.08	24.99
	BL6 - BL6	5.94	5.08	4.92	6.37	5.44	6.12	3.41	7	5.85	5.9
	BL6 + BL6	5.6	3.91	5.87	7.19	6.9	5.45	4.5	3.77	5.34	7.36
	BL6 + C3H	5.19	7	5.43	6.34	7.41	4.08	5.25	4.52	6.66	8.16
Panel	Group
E	C3H - C3H	5.1174	5.4847	5.2816	5.4855	5.2098	5.2605	5.2997	5.2974	5.3139	5.0981
	C3H + C3H	5.1678	5.122	4.8794	5.0612	5.5023	5.3299	4.963	4.9155	5.4042
	C3H + BL6	4.8345	5.4088	5.0715	4.9359	4.4976	4.84	4.8668	4.5839	4.6626
	BL6 - BL6	3.6801	3.6571	3.387	3.6691	3.5279	3.6983	3.2648	3.7843	3.6752	3.6934
	BL6 + BL6	3.6284	3.5695	3.5433	3.7719	3.8177	3.6947	3.4446	3.5457	3.4777	3.7288
	BL6 + C3H	3.7139	3.6429	3.4196	3.3868	3.9697	3.3752	3.3128	3.2628	3.608	3.5866
Panel	Group
F	C3H - C3H	67.3	66.4	74.3	72.6	72.9	68.1	68.4	77.3	74.8	70.1
	C3H + C3H	67.4	73.5	62	68.5	67	64.9	67.3	66.5	67.8
	C3H + BL6	70.2	68.2	58.3	64.3	66.4	67.8	70	73.5	68.2
	BL6 - BL6	36.8	36	35.5	36.5	37.9	37	35.8	39.8	36	36.4
	BL6 + BL6	35.9	34.5	37.2	35.5	40.7	41	34.3	31.8	37.8	39.2
	BL6 + C3H	34	43.1	38.6	36.9	36.1	35.9	35.7	36.3	37.1	44.3
Panel	Group
G	C3H - C3H	191.2	164.3	173.7	168.3	175	173.6	179.4	175.7	177.9	183.7
	C3H + C3H	179.6	186.5	192.8	184.7	170.8	175.6	187.3	188.9	174.7
	C3H + BL6	196.3	225.6	185	171.3	214.6	197.8	198.3	224	227.7
	BL6 - BL6	273.3	273.4	298.6	272.8	282.4	271.3	308.4	264.8	274.7	273.3
	BL6 + BL6	276.1	281.4	284.9	267.4	266.1	272.8	292	282.5	287.7	271.3
	BL6 + C3H	274	278.4	294.5	298.5	251.8	297	300.7	309	278.8	279.9
Panel	Group
H	C3H - C3H	97.4313	97.3884	97.4037	97.3684	97.3698	97.4136	97.3868	97.4074	97.4515	97.405
	C3H + C3H	97.412	97.3575	97.3996	97.3973	97.4191	97.402	97.4156	97.3912
	C3H + BL6	97.3468	97.4323	97.3276	97.3737	97.4	97.4272	97.4075	97.4398
	BL6 - BL6	97.3402	97.3783	97.372	97.2742	97.3708	97.6036	97.6334	97.3215	97.2747	97.2972
	BL6 + BL6	97.2849	97.2918	97.23	97.3506	97.3087	97.2642	97.2851	97.325	97.2859	97.3249
	BL6 + C3H	97.3135	97.2933	97.2771	97.3024	97.2235	97.3077	97.3169	97.2676	97.2953	97.3742
Panel	Group
I	C3H - C3H	356	358	352	368	373	372	384	367	367	360
	C3H + C3H	375	351	375	359	344	380	375	314	338
	C3H + BL6	356	350	338	347	345	349	384	339	331
	BL6 - BL6	192	191	188	192	193	175	189	202	180	191
	BL6 + BL6	183	183	178	188	187	191	185	186	184	199
	BL6 + C3H	186	181	178	187	186	184	182	180	187	180
Panel	Group
J	C3H - C3H	13.031	14.302	14.526	28.913	24.4	18.62	11.421	33.868	12.152	20.437
	C3H + C3H	18.373	10.325	13.235	18.91	17.512	42.053	11.69	10.733	10.901	9.779
	C3H + BL6	39.19	19.967	31.072	27.931	30.009	39.554	12.535	28.637	32.438	39.554
	BL6 - BL6	11.965	15.698	13.973	16.574	32.342	29.43	18.476	21.965	16.193	17.097
	BL6 + BL6	11.965	27.005	10.901	18.571	13.652	18.772	11.245	15.337	14.192	29.779
	BL6 + C3H	11.245	21.965	28.979	16.703	24.414	14.868	23.031	32.83	18.637	32.731
Panel	Group
K	C3H - C3H	64.487	67.321	29.308	36.081	71.808	69.279	87.424	46.371	79.462	40.466
	C3H + C3H	81.214	45.06	68.762	46.165	39.605	70.964	47.379	77.7	34.562	59.171
	C3H + BL6	24.2	84.68	58.748	45.484	66.132	41.051	46.04	64.951	46.371	52.759
	BL6 - BL6	36.865	49.818	60.892	33.826	48.064	35.823	48.926	40.177	33.268	48.409
	BL6 + BL6	55.077	21.075	55.474	29.786	55.077	20.333	40.03	32.635	61.33	38.762
	BL6 + C3H	58.328	50.176	60.892	65.889	38.211	42.245	62.216	77.7	31.713	48.064
