# Supplementary material for: The gut microbiota is a transmissible determinant of skeletal maturation
Source: eLife. 2021 Jan 12;10:e64237. doi: 10.7554/eLife.64237 (PMC7803376; doi:10.7554/eLife.64237)
Supplement: Figure 6—source data 1. [file elife-64237-fig6-data1.xlsx]

## Sheet: Figure 6
					Fgure 6
Panel	Group
A	C3H - C3H	1.43	1.61	1.79	1.54	1.71	1.57	1.78	1.49	1.4
	C3H + C3H	1.25	1.13	1.93	1.65	2.2	1.52	0.97	1.65	1.59	1.26
	C3H + BL6	3.92	5.41	2.28	1.96	3.18	2.41	2.24	3.94	3.42	2.12
	BL6 - BL6	2.4	4.44	1.76	3.41	1.79	5.31	2.88	3.83	1.76	3.05
	BL6 + BL6	1.08	2.3	1.16	2.41	1.99	1.65	1.91	2.68	2.67	6.05
	BL6 + C3H	0.74	1.41	1.39	1.17	0.93	0.77	0.93	1.35	3.54	1.39
Panel	Group
B	C3H - C3H	0.222114	0.590511	0.702187	0.658892	0.400413	0.29556	1.25834	1.49798	1.24619	1.12781
	C3H + C3H	1.07413	0.223359	1.11239	1.56846	0.607571	0.672927	1.83594	1.36464	1.09015	1.52999
	C3H + BL6	3.77262	1.84388	4.71044	3.88784	5.81052	1.96227	3.91367	2.63997	1.83467	5.0895
	BL6 - BL6	1.91928	10.238	1.27902	0.69838	5.63047	1.27273	6.2399	2.54848	2.63884	1.60187
	BL6 + BL6	2.51105	2.59468	2.3514	1.14264	5.13725	0.915431	0.801916	0.474185	0.224926	0.868455
	BL6 + C3H	0.457279	0.388186	0.407305	3.00666	0.363949	0.610695	0.707363	3.00117	1.86286	1.21548
Panel	Group
C	C3H - C3H	6.56	1.82	3.9	1.39	6.25	6.9	3.76	5.08	3.75	2.78
	C3H + C3H	2.88	1.53	6	3.01	5.65	2.53	0.78	1.96	2.29	0.74
	C3H + BL6	5.36	4.97	7.87	9.3	6.72	12	15.7	7.88	7.6
	BL6 - BL6	8.33	15.6	6.12	7.23	11.1	11.8	11.4	12.5	12.5	22.9
	BL6 + BL6	4.81	5.16	9.98	10.66	5.95	9.45	5.61	6.3	10.09	8.2
	BL6 + C3H	3.7	2.65	3.47	2.86	3.33	1.74	3.34	1.39	3.1	3.53
Panel	Group
D	C3H - C3H	0.259353	0.185491	0.514386	0.485295	0.363805	0.240599	0.370995	0.464593	0.380029
	C3H + C3H	0.647672	0.554676	0.58112	0.338132	0.202016	0.271715	0.312658	0.770733	0.289886
	C3H + BL6	0.99232	0.743824	1.21133	0.684891	0.586304	0.921464	0.932601	0.720072
	BL6 - BL6	0.892303	0.653824	1.2153	0.695891	0.487304	0.912464	0.862601	0.610072	0.99206
	BL6 + BL6	0.638746	0.69382	1.14	0.555527	0.78889	0.464405	0.497044	0.802372	0.931317
	BL6 + C3H	0.319353	0.255491	0.614386	0.375295	0.523805	0.320599	0.610995	0.714593	0.510029
Panel	Group
E	C3H - C3H	0.499168	0.824396	2.25137	0.948054	0.876602	1.55795	0.546595	0.383947	0.678608	1.43331
	C3H + C3H	0.584103	1.27207	2.1619	2.93111	0.684189	0.920142	2.31662	4.55955	0.965506	2.49033
	C3H + BL6	3.61606	5.37762	3.51061	4.41749	2.10561	2.09961	5.64343	2.49237	9.08399	4.645
	BL6 - BL6	1.03651	2.02628	1.70176	1.13987	4.42134	1.35047	4.17171	7.00311	5.37126	3.83132
	BL6 + BL6	4.87699	1.31538	7.42079	3.76865	6.66469	3.93527	2.56317	6.93617	3.06616	2.57918
	BL6 + C3H	4.47398	6.13587	2.77139	5.58691	2.99153	4.53514	2.02267	5.02898	2.22734	3.20549
Panel	Group
F	C3H - C3H	0.365729	1.49101	1.23985	2.14727	0.46315	0.259489	0.195516	0.133562	0.16842	0.536008
	C3H + C3H	0.414442	0.502282	0.509232	0.295616	0.45198	6.89678	0.27064	0.918407	0.228898	0.266319
	C3H + BL6	3.60345	2.84492	5.16003	4.65505	4.70229	3.26866	2.94298	3.02111	5.10867	5.20539
	BL6 - BL6	2.41512	3.87442	3.58266	4.26458	2.45612	2.58425	4.04491	2.32058	4.39403	2.40798
	BL6 + BL6	0.260802	0.211438	0.208033	0.068921	0.068921	6.59995	4.59641	3.85546	1.31196	7.29845
	BL6 + C3H	0.274004	0.637734	2.20058	0.639309	0.722922	1.11755	1.41215	1.16892	0.728621	1.33783
Panel	Group
G	C3H - C3H	0.572939	0.893437	0.893621	1.10297	0.764576	0.999476	1.68629	1.17356	0.828004	1.08513
	C3H + C3H	0.892101	1.01571	0.325431	0.703374	0.759689	1.91369	0.873244	0.402437	1.31727	0.984675
	C3H + BL6	1.35422	3.03159	1.33111	2.0125	2.23531	3.60081	1.73198	2.98798	3.1447	2.36091
	BL6 - BL6	2.24708	2.42012	4.10677	3.25754	2.39975	2.6813	4.14851	2.36544	2.62335	2.64153
	BL6 + BL6	1.79415	2.18718	2.83722	1.94522	2.62149	3.02898	3.28525	2.86149	3.03216	3.19746
	BL6 + C3H	2.24708	1.21006	1.02669	3.25754	2.39975	1.34065	2.07425	1.18272	1.31167	2.64153
Panel	Group
H	C3H - C3H	0.33513	1.05556	3.69286	1.57291	0.887736	0.135812	0.637263	0.656435	0.65111	0.375186
	C3H + C3H	0.215138	0.912513	1.75199	0.52152	0.649808	6.78215	0.271963	0.90627	1.34699	0.991173
	C3H + BL6	0.662593	0.950828	0.576088	1.38011	5.94467	1.2632	0.349681	2.05159	0.331989	3.96212
	BL6 - BL6	0.133432	5.56813	0.684098	0.731495	0.670923	1.94801	7.88452	0.83327	0.673547	3.34505
	BL6 + BL6	0.424126	0.398549	0.566136	0.324098	0.572004	2.46863	3.23395	1.67892	0.924173	5.66388
	BL6 + C3H	0.236814	0.848775	2.20088	0.380565	0.6817	0.419818	0.304861	0.427175	1.93143	0.244417
Panel	Group
I	C3H - C3H	1.48752	1.08648	0.334909	0.357814	2.46905	0.659788	0.932363	0.718862	0.474424	1.47879
	C3H + C3H	1.86544	1.55826	1.37098	1.98245	1.25667	1.03232	1.02121	1.39545	2.17509	1.37759
	C3H + BL6	1.6996	1.64269	2.01456	2.30872	3.26576	1.75485	4.10975	1.95476	4.47153	3.14264
	BL6 - BL6	0.620968	0.979346	2.04578	5.30308	4.36973	0.91131	1.28288	2.94757	4.90862	3.30906
	BL6 + BL6	2.7851	3.62985	3.39304	4.97925	3.30878	1.95586	2.79222	2.98891	2.2039	2.34131
	BL6 + C3H	1.33341	2.39038	4.26523	3.91199	4.08886	2.86737	2.47152	3.73432	3.65069	1.90158
